# Supplementary material for: Highly luminescent complexes [Mo6X8(n-C3F7COO)6]2− (X = Br, I)
Source: Royal Society of Chemistry journal article supplement (doi:10.1039/c1dt10376h), 2011-01-01
Supplement: c1dt10376h.pdf [file c1dt10376h.pdf]

## Electronic Supplementary Information

### Record luminescence characteristics of $[\text{Mo}_6\text{X}_8(\text{n-C}_3\text{F}_7\text{COO})_6]^{2-}$ (X = Br, I)

**Maxim N. Sokolov,<sup>\*a,b</sup> Maxim A. Mihailov <sup>a</sup> Eugenia V. Peresyphkina,<sup>a</sup> Konstantin A. Brylev,<sup>a</sup> Noboru Kitamura<sup>c</sup> and Vladimir P. Fedin<sup>a,b</sup>**

<sup>a</sup> *Nikolaev Institute of Inorganic Chemistry, Siberian Branch of the Russian Academy of Sciences, 3 Acad. Lavrentiev Prosp., 630090 Novosibirsk, Russia. Fax: 7 3833309489; Tel: 7 3833309490; E-mail: caesar@niic.nsc.ru*

<sup>b</sup> *Novosibirsk State University, 2 Ul. Pirogova, 630090, Novosibirsk, Russia*

<sup>c</sup> *Department of Chemistry, Graduate School of Science, Hokkaido University, 060-0810 Sapporo, Japan; Tel. 81-011-7061697; kitamura@sci.hokudai.ac.jp*

**Table S1. Selected bond distances (Å) and valence angles (°) of 1a, 2, and 3**

| Complex       | <b>1</b>                | <b>2</b>            | <b>3</b>            |
|---------------|-------------------------|---------------------|---------------------|
| M-M           | 2.59516(16)-2.60230(16) | 2.6222(5)-2.6289(5) | 2.6584(4)-2.6658(4) |
| M- $\mu_3$ -X | 2.4637(3)- 2.4878(3)    | 2.5885(5)-2.6179(5) | 2.7583(3)-2.7880(3) |
| M-O           | 2.0952(10)-2.1082(10)   | 2.104(3)- 2.119(3)  | 2.120(2)-2.141(2)   |
| C-O(M)        | 1.2775(17)-1.2852(17)   | 1.277(5)-1.288(5)   | 1.261(4)-1.269(4)   |
| C=O           | 1.2094(18)-1.2123(17)   | 1.205(5)-1.215(5)   | 1.220(4)-1.215(4)   |
| M-O-C         | 126.28(9)-134.56(9)     | 128.0(3)-135.5(3)   | 129.6(2)-137.1(2)   |
| O-C-O         | 129.36(14)-130.18(14)   | 129.7(4)-130.6(4)   | 130.2(3)-131.4(3)   |

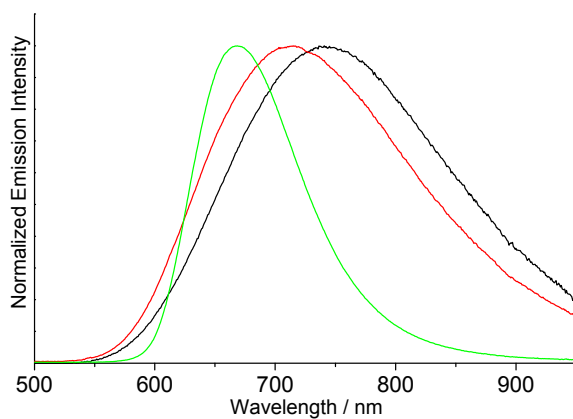

**Fig S1.** Emission spectra for **1** (black), **2** (red), and **3** (green) in the solid state at 298 K.

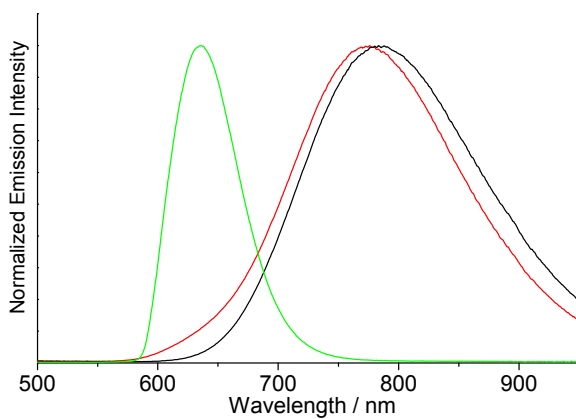

**Fig. S2.** Emission spectra for **1** (black), **2** (red), and **3** (green) in the solid state at 80 K.

**XP171 (PPh<sub>4</sub>)<sub>2</sub>Mo<sub>6</sub>Cl<sub>8</sub>(O<sub>2</sub>CC<sub>3</sub>F<sub>7</sub>)<sub>6</sub> scan neg MeCN conos crecie**

scic\_rl\_374 56 (1.092) Cm (27:56)

TOF MS ES-  
2.93e3

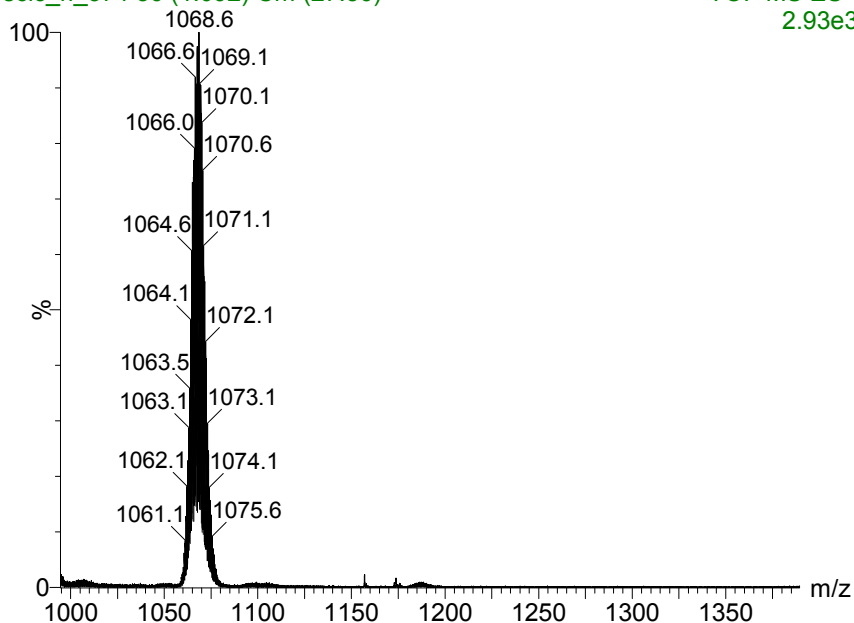

**XP171 (PPh<sub>4</sub>)<sub>2</sub>Mo<sub>6</sub>Cl<sub>8</sub>(O<sub>2</sub>CC<sub>3</sub>F<sub>7</sub>)<sub>6</sub> scan neg MeCN cc**

scic\_rl\_374 (0.019) Cu (0.20); Is (1.00,0.01) Mo<sub>6</sub>Cl<sub>8</sub>O<sub>12</sub>C<sub>24</sub>F<sub>42</sub>

6.35e11

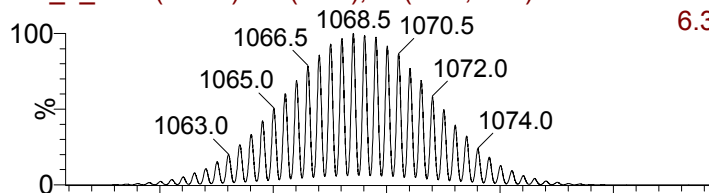

scic\_rl\_374 39 (0.768) Sm (Mn, 2x2.00); Cm (28:43)

1.25e3

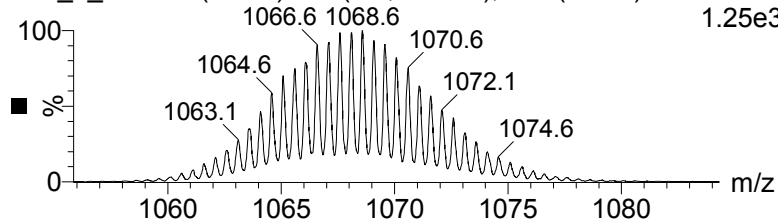

Fig. S3. ESI-MS of **1** at the negative voltage. Top: the spectrum in CH<sub>3</sub>CN. Bottom: calculated and observed isotopic patten for the peak attributable to [Mo<sub>6</sub>Cl<sub>8</sub>(C<sub>3</sub>F<sub>7</sub>COO)<sub>6</sub>]<sup>2-</sup>.
